# Supplementary material for: An oomycete effector subverts host vesicle trafficking to channel starvation-induced autophagy to the pathogen interface
Source: eLife journal article supplement (doi:10.7554/elife.65285), 2021-08-23
Supplement: fig2-data1 [file Figure 2D.xlsx]

## Sheet: 16-05-19
	RD54	RD54 AIM	Water
	3	8	15
	1	9	12
	0	10	18
	2	15	9
	2	18	12
	3	24
	1.83333	14	13.2

## Sheet: 22-05-19
	RD54	RD54 AIM	Water
	0	15	12
	1	17	18
	1	8	24
	0	15	11
	0	13	8
	0.4	13.6	14.6

## Sheet: 23-05-19
	RD54	RD54 AIM	Water
	4	12	25
	1	10	15
	1	15	18
	1	16	10
	1	24	17
	2	26	12
	3
	1.85714	17.1667	16.1667

## Sheet: Total
Autophagosomes	Construct	Repeaat
3	RD54	1		3	8	15
1	RD54	1		1	9	12
0	RD54	1		0	10	18
2	RD54	1		2	15	9
2	RD54	1		2	18	12
3	RD54	1		3	24	12
8	RD54 AIM	1		0	15	18
9	RD54 AIM	1		1	17	24
10	RD54 AIM	1		1	8	11
15	RD54 AIM	1		0	15	8
18	RD54 AIM	1		0	13	25
24	RD54 AIM	1		4	12	15
15	Water	1		1	10	18
12	Water	1		1	15	10
18	Water	1		1	16	17
9	Water	1		1	24	12
12	Water	1		2	26
0	RD54	2		3
1	RD54	2
1	RD54	2		1.44444	15	14.75
0	RD54	2		18	17	16
0	RD54	2		1.12683e-08	0.892564	1.55991e-08
15	RD54 AIM	2
17	RD54 AIM	2
8	RD54 AIM	2
15	RD54 AIM	2
13	RD54 AIM	2
12	Water	2
18	Water	2
24	Water	2
11	Water	2
8	Water	2
4	RD54	3
1	RD54	3
1	RD54	3
1	RD54	3
1	RD54	3
2	RD54	3
3	RD54	3
12	RD54 AIM	3
10	RD54 AIM	3
15	RD54 AIM	3
16	RD54 AIM	3
24	RD54 AIM	3
26	RD54 AIM	3
25	Water	3
15	Water	3
18	Water	3
10	Water	3
17	Water	3
12	Water	3
