# Supplementary material for: An oomycete effector subverts host vesicle trafficking to channel starvation-induced autophagy to the pathogen interface
Source: eLife journal article supplement (doi:10.7554/elife.65285), 2021-08-23
Supplement: fig2-data1 [file Figure 2F.xlsx]

## Sheet: 01-05-19
	50uM
		RD54	RD54 AIM	Water
		4	5	9
		5	7	7
		7	5	13
		3	11	11
		6	9	6
		6	7	8
		4	10	10
		5	6	6
		5	7.5	8.75

## Sheet: 14-05-19
	50uM
		RD54		RD54 AIM		Water
	2	12	3	20	12	14
	6	10	4	16	13	18
	10	7	5	17	14	15
	11	11	7	14	15	14
	17	14	8	18	16	14
			9	6	18	9
		10.8		15.1667		14

## Sheet: 27-05-95
	50uM
		RD54		RD54 AIM		Water
		16		14		12
		8		16		14
		4		13		22
		10		5		18
		8		15		4
		11		13		6
		11		18		16
		9		24		19
		9.625		14.75		13.875

## Sheet: Total
Construct	Autophagosomes	Repeaat
RD54	4	1
RD54	5	1
RD54	7	1
RD54	3	1
RD54	6	1
RD54	6	1
RD54	4	1
RD54	5	1
RD54	12	2
RD54	10	2
RD54	7	2
RD54	11	2
RD54	14	2
RD54	16	3
RD54	8	3
RD54	4	3
RD54	10	3
RD54	8	3
RD54	11	3
RD54	11	3
RD54	9	3
RD54 AIM	5	1
RD54 AIM	7	1
RD54 AIM	5	1
RD54 AIM	11	1
RD54 AIM	9	1
RD54 AIM	7	1
RD54 AIM	10	1
RD54 AIM	6	1
RD54 AIM	20	2
RD54 AIM	16	2
RD54 AIM	17	2
RD54 AIM	14	2
RD54 AIM	18	2
RD54 AIM	6	2
RD54 AIM	14	3
RD54 AIM	16	3
RD54 AIM	13	3
RD54 AIM	5	3
RD54 AIM	15	3
RD54 AIM	13	3
RD54 AIM	18	3
RD54 AIM	24	3
Water	9	1
Water	7	1
Water	13	1
Water	11	1
Water	6	1
Water	8	1
Water	10	1
Water	6	1
Water	14	2
Water	18	2
Water	15	2
Water	14	2
Water	14	2
Water	9	2
Water	12	3
Water	14	3
Water	22	3
Water	18	3
Water	4	3
Water	6	3
Water	16	3
Water	19	3
