# Supplementary material for: An oomycete effector subverts host vesicle trafficking to channel starvation-induced autophagy to the pathogen interface
Source: eLife journal article supplement (doi:10.7554/elife.65285), 2021-08-23
Supplement: fig7-data1 [file Figure 7 supplement 8B-C.xlsx]

## Sheet: 150620
hpRab8a	Ole/RD54	RD54	Ole	%		hpGus	Ole/RD54	RD54	Ole	%
	30	57	542	0.526316			52	71	180	0.732394
	22	47	361	0.468085			31	57	380	0.54386
	22	42	283	0.52381			49	64	327	0.765625
	48	75	364	0.64			24	31	415	0.774194
	21	44	298	0.477273			43	65	490	0.661538
	21	46	281	0.456522			42	48	379	0.875
	22	37	176	0.594595			51	64	419	0.796875
	14	37	343	0.378378			59	72	352	0.819444
	14	38	280	0.368421			50	66	277	0.757576
	30	53	274	0.566038			55	62	338	0.887097
	24.4	47.6	320.2	0.499944			45.6	60	355.7	0.76136

## Sheet: 210620
hpRab8a	Ole/RD54	RD54	Ole	%		hpGus	Ole/RD54	RD54	Ole	%
	23	42	367	0.547619			16	34	366	0.470588
	24	53	239	0.45283			29	42	334	0.690476
	28	47	420	0.595745			31	41	279	0.756098
	38	64	393	0.59375			52	56	298	0.928571
	26	41	283	0.634146			40	54	319	0.740741
	24	45	66	0.533333			44	71	348	0.619718
	27	43	876	0.627907			65	73	340	0.890411
	19	35	219	0.542857			68	75	328	0.906667
	24	60	423	0.4			47	54	391	0.87037
	18	40	191	0.45			59	69	234	0.855072
	25.1	47		0.537819		Average	45.1	56.9		0.772871

## Sheet: 270620
hpRab8a	Ole/RD54	RD54	Ole	%		hpGus	Ole/RD54	RD54	Ole	%
	18	40	326	0.45			60	76	335	0.789474
	26	41	592	0.634146			49	60	435	0.816667
	21	39	339	0.538462			43	57	429	0.754386
	27	41	384	0.658537			44	64	462	0.6875
	13	27	404	0.481481			65	90	395	0.722222
	31	55	561	0.563636			52	82	462	0.634146
	31	50	345	0.62			60	86	434	0.697674
	32	48	272	0.666667			56	76	450	0.736842
	20	35	283	0.571429			44	61	423	0.721311
	36	51	473	0.705882			64	85	271	0.752941
Total	25.5	42.7	397.9	0.59719			53.7	73.7	409.6	0.731316

## Sheet: Total
hpRab8a	Ole/RD54	RD54	Ole	%		hpGus	Ole/RD54	RD54	Ole	%
	30	57	542	0.526316			52	71	180	0.732394
	22	47	361	0.468085			31	57	380	0.54386
	22	42	283	0.52381			49	64	327	0.765625
	48	75	364	0.64			24	31	415	0.774194
	21	44	298	0.477273			43	65	490	0.661538
	21	46	281	0.456522			42	48	379	0.875
	22	37	176	0.594595			51	64	419	0.796875
	14	37	343	0.378378			59	72	352	0.819444
	14	38	280	0.368421			50	66	277	0.757576
	30	53	274	0.566038			55	62	338	0.887097
	23	42	366	0.547619			16	34	367	0.470588
	24	53	334	0.45283			29	42	239	0.690476
	28	47	279	0.595745			31	41	420	0.756098
	38	64	298	0.59375			52	56	393	0.928571
	26	41	319	0.634146			40	54	283	0.740741
	24	45	348	0.533333			44	71	66	0.619718
	27	43	340	0.627907			65	73	876	0.890411
	19	35	328	0.542857			68	75	219	0.906667
	24	60	391	0.4			47	54	423	0.87037
	18	40	234	0.45			59	69	191	0.855072
	18	40	326	0.45			60	76	335	0.789474
	26	41	592	0.634146			49	60	435	0.816667
	21	39	339	0.538462			43	57	429	0.754386
	27	41	384	0.658537			44	64	462	0.6875
	13	27	404	0.481481			65	90	395	0.722222
	31	55	561	0.563636			52	82	462	0.634146
	31	50	345	0.62			60	86	434	0.697674
	32	48	272	0.666667			56	76	450	0.736842
	20	35	283	0.571429			44	61	423	0.721311
	36	51	473	0.705882			64	85	271	0.752941
Average	25	45.7667	347.267	0.542262			48.1333	63.5333	371	0.755183
	7.51091	9.78628	92.5568				12.7001	14.6799	137.763
	1.3713	1.78672	16.8985					2.68017	25.152
