# Supplementary material for: An oomycete effector subverts host vesicle trafficking to channel starvation-induced autophagy to the pathogen interface
Source: eLife journal article supplement (doi:10.7554/elife.65285), 2021-08-23
Supplement: fig7-data1 [file Figure 7H.xlsx]

## Sheet: 110319
	RD54					joka2					EV
		Colocalised	Green	Red	%		Colocalised	Green	Red	%		Colocalised	Green	Red	%
		54	295	406	0.183051		52	282	369	0.184397		59	403	409	0.146402
		94	276	430	0.34058		72	275	388	0.261818		29	287	322	0.101045
		45	214	295	0.21028		58	316	311	0.183544		75	326	466	0.230061
		105	303	503	0.346535		99	300	584	0.33		88	283	478	0.310954
		103	283	444	0.363958		32	274	218	0.116788		51	209	424	0.244019
		75	228	545	0.328947		72	383	373	0.18799		71	264	450	0.268939
		92	251	510	0.366534		55	229	448	0.240175		69	342	491	0.201754
		50	188	250	0.265957		49	201	269	0.243781		63	307	413	0.205212
			254.75	422.875	0.30073			282.5	370	0.218562			302.625	431.625	0.213548

## Sheet: 140319
	RD54					joka2					EV
		Colocalised	Green	Red	%		Colocalised	Green	Red	%		Colocalised	Green	Red	%
		85	262	476	0.324427		69	266	368	0.259398		66	317	623	0.208202
		66	342	321	0.192982		23	372	250	0.061828		84	342	591	0.245614
		32	347	370	0.092219		33	542	311	0.0608856		34	345	316	0.0985507
		72	302	431	0.238411		47	248	206	0.189516		21	243	329	0.0864198
		61	227	424	0.268722		23	382	248	0.0602094		64	258	378	0.248062
		36	215	269	0.167442		42	400	310	0.105		34	312	473	0.108974
		91	317	523	0.287066		51	369	314	0.138211		36	291	312	0.123711
		72	260	400	0.276923		78	315	441	0.247619		32	254	300	0.125984
			284	401.75	0.231024			361.75	306	0.140334			295.25	415.25	0.15569

## Sheet: 230319
	RD54					joka2					EV
		Colocalised	Green	Red	%		Colocalised	Green	Red	%		Colocalised	Green	Red	%
		33	220	445	0.15		51	340	463	0.15		23	252	461	0.0912698
		36	219	469	0.164384		19	303	300	0.0627063		29	209	274	0.138756
		27	192	375	0.140625		54	335	417	0.161194		51	274	441	0.186131
		60	340	435	0.176471		53	239	419	0.221757		49	262	307	0.187023
		71	331	468	0.214502		63	250	473	0.252		35	172	341	0.203488
		79	309	496	0.255663		49	291	394	0.168385		26	212	286	0.122642
		94	279	544	0.336918		51	247	447	0.206478		43	178	348	0.241573
		55	301	420	0.182724		34	214	210	0.158879		50	262	422	0.19084
		78	263	471	0.296578		36	259	404	0.138996
			272.667	458.111	0.213096			275.333	391.889	0.168933			227.625	360	0.170215

## Sheet: Total
	RD54					joka2					EV
	54	295	406	0.183051		52	282	369	0.184397		59	403	409	0.146402
	94	276	430	0.34058		72	275	388	0.261818		29	287	322	0.101045
	45	214	295	0.21028		58	316	311	0.183544		75	326	466	0.230061
	105	303	503	0.346535		99	300	584	0.33		88	283	478	0.310954
	103	283	444	0.363958		32	274	218	0.116788		51	209	424	0.244019
	75	228	545	0.328947		72	383	373	0.18799		71	264	450	0.268939
	92	251	510	0.366534		55	229	448	0.240175		69	342	491	0.201754
	50	188	250	0.265957		49	201	269	0.243781		63	307	413	0.205212
	85	262	476	0.324427		69	266	368	0.259398		66	317	623	0.208202
	66	342	321	0.192982		23	372	250	0.061828		84	342	591	0.245614
	32	347	370	0.092219		33	542	311	0.0608856		34	345	316	0.0985507
	72	302	431	0.238411		47	248	206	0.189516		21	243	329	0.0864198
	61	227	424	0.268722		23	382	248	0.0602094		64	258	378	0.248062
	36	215	269	0.167442		42	400	310	0.105		34	312	473	0.108974
	91	317	523	0.287066		51	369	314	0.138211		36	291	312	0.123711
	72	260	400	0.276923		78	315	441	0.247619		32	254	300	0.125984
	33	220	445	0.15		51	340	463	0.15		23	252	461	0.0912698
	36	219	469	0.164384		19	303	300	0.0627063		29	209	274	0.138756
	27	192	375	0.140625		54	335	417	0.161194		51	274	441	0.186131
	60	340	435	0.176471		53	239	419	0.221757		49	262	307	0.187023
	71	331	468	0.214502		63	250	473	0.252		35	172	341	0.203488
	79	309	496	0.255663		49	291	394	0.168385		26	212	286	0.122642
	94	279	544	0.336918		51	247	447	0.206478		43	178	348	0.241573
	55	301	420	0.182724		34	214	210	0.158879		50	262	422	0.19084
	78	263	471	0.296578		36	259	404	0.138996
				0.246876					0.175662					0.179818
