# Supplementary material for: An oomycete effector subverts host vesicle trafficking to channel starvation-induced autophagy to the pathogen interface
Source: eLife. 2021 Aug 23;10:e65285. doi: 10.7554/eLife.65285 (PMC8382295; doi:10.7554/eLife.65285)
Supplement: Source data 1. [file elife-65285-data1.xlsx]

## Sheet: Sheet1
Main text
Figure	Experiment	Conditions	Normality	Average	Test	p value	significance	N number
1B	AIMp construct autophagosomes	AIMp	1.417e-05	1.73913	T test	2e-07	****	23
		GUS	0.5956	10.1818		0.00000002 tail/RD54	****	22
		PexRD54	0.1584	39.6842		1.8e-07	****	19
2F	AIM peptide leaf autophagosomes	AIMp	0.4228	8.14286	T test	0.0046	**	21
		mAIMp	0.2089	12.2273		0.9083	ns	22
		Buffer	0.6692	12.0455		0.0063 RD54/RD54 AIM	***	22
2D	AIM peptide root autophagosomes	AIMp	0.03924	1.44444	Welch	1.127e-08	****	18
		mAIMp	0.1103	15		0.8926	ns	17
		Buffer	0.1629	14.75		0.0000000156 RD54/RD54 AIM	****	16
4D	RD54/AIM ATG8-Rab8 coloc	RD54	0.1959	85.3205	Welch	1.271e-08	****	18
		AIMp	1.737e-07	5.88235		2.471e-11	****	17
		EV	0.7197	60.4469		0.00000000000004295 RD54/AIMp	****	18
5B	WT n.benthi Rab8a RNAi/RD54 autophagosomes	EV/GUS RNAi	0.005151	8.83333	Welch	evgus/evhpr8 0.112	ns	24
		RD54/GUS RNAi	0.002425	29.8077		rd54gus/rd54hpr8 5.05e-8 rd54gus/ev gus 3.13e-9	****	26
		EV/Rab8 RNAi	0.076	9.80769		rd54hpr8/evhpr80.876	ns	27
		RD54/Rab8 RNAi	2.458e-05	11.2308				26
5D	Trans n. benthi Rab8a RNAi/RD54 autophagosomes	EV/GUS RNAi	0.1607	8.875	Welch	evgus/evhpr8 0.169	ns	32
		RD54/GUS RNAi	0.03845	24.4571		rd54gus/rd54hpr8 0.206 rd54gus/ev gus 1.12e-11	ns and ****	35
		EV/Rab8 RNAi	0.2035	10.6765		rd54hpr8/evhpr8 9.71e-12	****	34
		RD54/Rab8 RNAi	0.07286	27.5714				35
6D	RD54/J2/EV ATG8-Rab8 coloc	RD54	0.04363	87.65	Welch	5.215e-09	****	20
		Joka2	0.9766	42.3		0.03701	*	20
		EV	0.2855	54.8		0.000000001432 RD54/J2	****	20
6F	hpRab8 Joka2 autophagosomes	hpGUS	6.634e-06	42.8333	Welch	0.62	ns	42
		hpRab8	3.064e-07	51.3171				41
7B	Rd54/Dark autophagosomes	EV	0.07912	13.2778	Welch	EV/StressEV 0.00711	**	18
		Stress EV	0.8468	24.1667				18
		RD54	0.02277	58.9444		RD54/StressRD54 0.924	ns	18
		Stress RD54	0.6894	56.6111		ev/RD54 0.000000672	****	18
7D	Light dark rab8/atg8 colocalisation	Light	0.1204	66.205	T test	0.000172	***	44
		Dark	0.6314	78.6388				44
7F	Light dark Rab8/bodipy colocalisation	Light	0.0006278	0.101926	Welch	0.00138	**	24
		Dark	0.07346	0.139919				24
7H	RD54/J2 Rab8/bodipy colocalisation	RD54	0.2952	0.247515	T test	0.00202	**	25
		Joka2	0.3855	0.176307		0.83	ns	25
		EV	0.232	0.180507		RD54/Joka2 0.00174	**	24
9D	AIMp construct infection lesion	AIMp	2.935e-05	64.5631	Welch	4.97e-05	****	84
		EV	0.0006223	87.3681				85
Supplement
Figure	Experiment	Conditions	Normality	Average	Test	p value	significance	N number
3 supp 3B	WT Rab8 localisation	Ton	0.6555	34.1188	Welch	0.000001791 ton/PM	****	22
		Cyt	0.1026	19.3991		4.237e-10 ton/cyt	****	22
		PM	0.006774	46.4821		0.000000000000005689 PM/cyt	****	22
3 supp 3C	S29N Rab8 localisation	Ton	0.7685	36.4251	T test	0.7948 ton/PM	ns	22
		Cyt	0.976	27.5645		0.000004106 ton/cyt	****	22
		PM	0.2498	36.0104		0.00005352 PM/cyt	***	22
3 supp 3D	Q74L Rab8 localisation	Ton	0.02238	47.5998	Welch	0.0000000000442 ton/PM	****	22
		Cyt	0.02415	28.7693		0.000000001475 ton/cyt	****	22
		PM	0.176	23.6309		0.01134 PM/cyt	*	22
3 supp 4E	Rab8 mutants/RD54 colocalisation	Rab8aS29N	0.8653	67.6698	Welch	GDP/WT 0.26	ns	23
		Rab8a	0.3303	62.3416		GDP/GFP 6.33E-18	****	23
		Rab8aQ74L	0.1196	25.1987		WT/GFP 0.000000000000000298	****	20
		EV	9.851e-06	10.7666		WT/GFP 1.84e- 7 GTP/GFP 2.74e- 4	****/***	23
4 supp 1C	RD54 ATG8-Rab8 coloc	RD54	0.2137	88.8508	T test	2.814e-08	****	23
		HA EV	0.8066	59.1167				25
5 supp 2B	hpRab8 RD54/EV 8c autophagosomes	hpgus/EV	0.08446	9.32	Welch	EV(hpR8/hpGUS) 0.71	ns	25
		hpRab/EV	0.8966	9.33333				24
		hpgus/RD54	0.8066	24.7083		RD54(hpR8/hpGus) 2.59e-5	****	24
		hpRab/RD54	0.01091	13.2609				23
5 supp 5	hpRab8a 1-4 autophagosomes	hpRab8	0.1852	8.58065	Welch	5.972e-07	****	31
		hpGus	0.3917	13.6774				31
5 supp 6	hpRab8a RD54 autophagosomes	hpRab8	0.06058	12.6667	T test	6.126e-08	****	24
		hpGus	0.3099	32.7917				24
5 supp 7B	DNRab8a/WTRab8 + HA:EV/HA:RD54	DNR8/EV	0.002384	7.95652	Welch	EV(DN/WT) 0.883	ns	23
		WTR8/EV	0.4843	7.7619				21
		DNR8/RD54	0.1499	12.05		RD54(DN/WT) 0.0000446	****	20
		WTR8/RD54	0.004254	26.4783				23
5 Supp 8B	Rab8a (N128I) shows dominant negative effect rep1	GFP:Rab8aN128I	0.03836	23	Mann-Whitney	P=0,029	*	7
		GFP:EV	0.5493	39				7
	Rab8a (N128I) shows dominant negative effect rep2	GFP:Rab8aN128I	0.5236	32	Mann-Whitney	P=1.2e-05	****	14
		GFP:EV	0.217	69				14
5 supp 9B	Rab8a mutants RD54 autophagosomes	GDP	0.2129	37.913	Welch	GDP/GTP 0.0000200 GDP/WT 0.000143 GDP/WT 0.00057	****	23
		WT	0.01407	20.1304		WT/GFP 0.031 WT/GTP 0.209	* and ns	23
		GTP	0.05371	16.55		GTP/GFP 0.140	ns	20
		EV	0.06304	13.1				20
7 supp 8B	hpRab8a RD54 /oleosin coloc (% only)	hpRab8	0.5844	0.542262	T test	1.008e-11	****	30
		hpGus	0.3187	0.755183				30
7 supp 8C	hpRab8a RD54 oleosin LDs	hpRab8	0.0009689	347.267	Welch	0.4367	ns	30
		hpGus	0.003642	371				30
7 supp 10	hpSeipin LDs	hpSeipin	0.2439	251.812	T test	0.0008951	***	16
		hpGus	0.08622	482.188				16
7 supp 11	hpSeipin RD54 puncta	hpSeipin	0.0006344	31.6087	Welch	0.004537	**	24
		hpGus	0.05763	45.3913				24
